# Supplementary material for: Xanthohumol Impairs the PMA-Driven Invasive Behaviour of Lung Cancer Cell Line A549 and Exerts Anti-EMT Action
Source: MDPI journal article supplement (doi:10.3390/cells10061484), 2021-06-12
Supplement: s1 [file s1]

# Xanthohumol impairs the PMA-driven invasive behaviour of lung cancer cell line A549 and exerts anti-EMT action.

Adrianna Sławińska-Brych <sup>1,\*</sup>, Magdalena Mizerska-Kowalska <sup>2</sup>, Sylwia Katarzyna Król <sup>3</sup>, Andrzej Stepulak <sup>4</sup> and Barbara Zdzisińska <sup>2</sup>

## Supplementary Methods

### 1. Assessment of caspase-3 activity

For caspase activity assessment, the cells were plated in 6-well tissue culture plates ( $4 \times 10^5$  cells/well). Following 24 h of treatment with a combination of PMA (50nM) and XN (0-40  $\mu$ M), the cells were labelled with PE-conjugated anti-active caspase-3 antibody (BD Biosciences, BD Pharmingen™, USA) according to the manufacturer's instructions and analyzed with a FACSCalibur flow cytometer using CellQuest software.

### 2. Assessment of cell proliferation

The cells ( $1 \times 10^4$  cells/well) in a complete medium were seeded into 96-well plates (100  $\mu$ l/well) and then exposed to a combination of PMA and XN (0-80  $\mu$ M,) for 24 h. Following the treatment, cell proliferation was estimated by measuring the amount of BrdU incorporated into nuclear DNA using a commercial Cell Proliferation ELISA, BrdU Kit (Roche Molecular Biochemicals, Germany) according to the manufacturer's instructions. The absorbance values were measured at 450 nm using an ELISA reader

## Supplementary Figure 1.

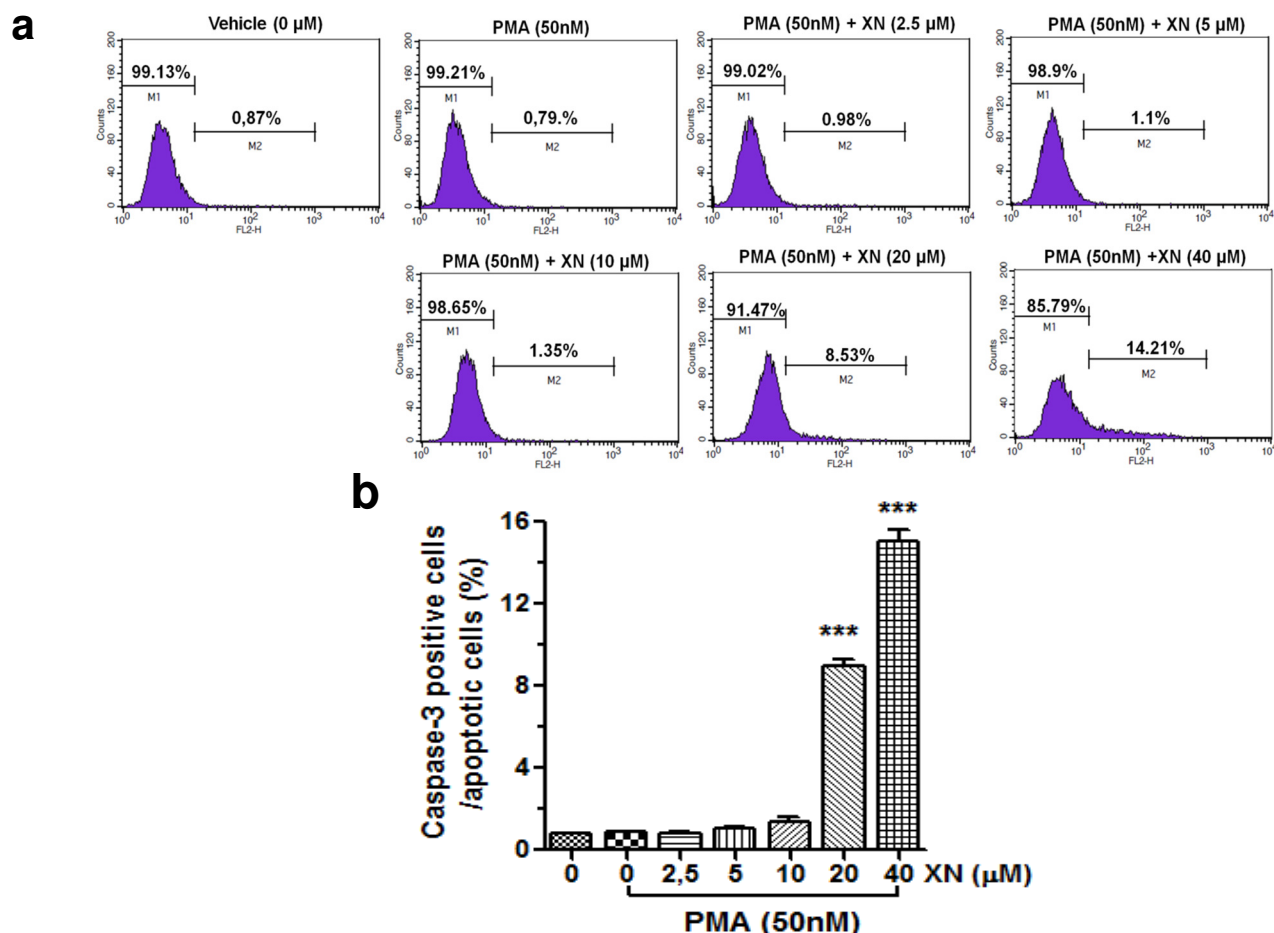

**Figure S1.** Effect of XN on induction of apoptosis in PMA-stimulated A549 cells. After the 24-h exposure to PMA (50 nM) alone or in combination with increasing concentrations of XN, the cells were subjected to flow cytometry

analysis of active caspase-3. (a) Representative histograms of the A549 cell line. Symbols M1 and M2 represent peaks for viable (caspase-3 negative cells) and apoptotic cell fractions (caspase-3 positive cells), respectively. (b) Quantification of caspase-3 activity in the A549 cells. The results are the mean  $\pm$  SD from three independent experiments (\*\* $p < 0.001$  in comparison to the PMA only-treated cells; one-way ANOVA test).

## Supplementary Figure 2.

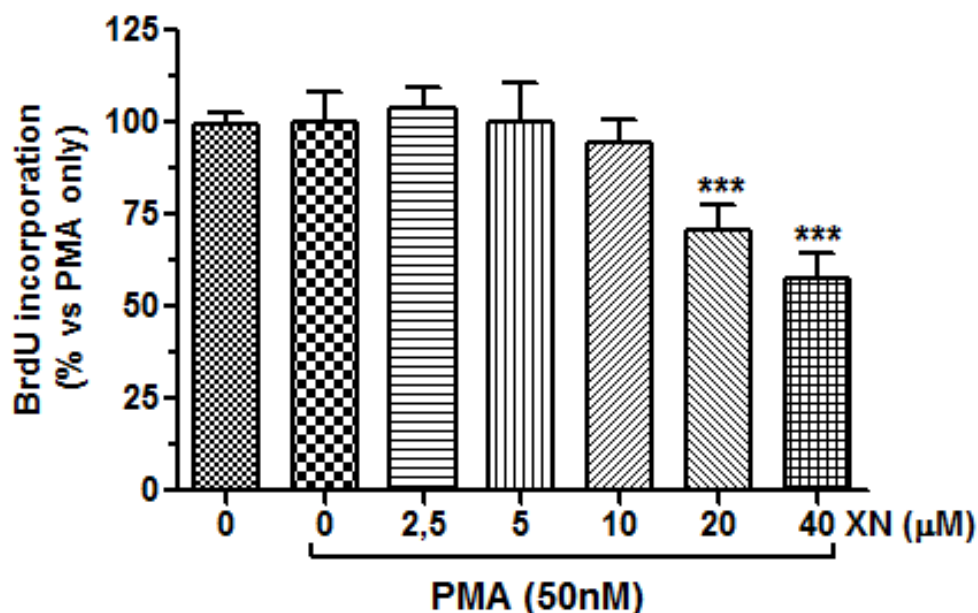

**Figure S2.** Effect of XN on proliferation of the PMA-stimulated lung cancer cell line. A549 cells were cultured alone or exposed to combinations of 50 nM PMA with increasing concentrations of XN (0-80  $\mu$ M) for 24 h. After the treatment, the proliferation of the A549 cells was determined with the BrdU assay. The results represent the mean  $\pm$  SD of three independent experiments; statistical significance at  $p < 0.001$  \*\*\* in comparison to the PMA treated cells; one-way ANOVA test.
